# Supplementary material for: Early versus Delayed Surgery in Patients with Left-Sided Infective Endocarditis and Stroke
Source: MDPI journal article supplement (doi:10.3390/jcdd10080356), 2023-08-21
Supplement: s1 [file s1]

## Supplementary materials

**Table S1.** Demographic data of all 688 left-sided infective endocarditis patients with or without preoperative neurological complications

| Variable                                      | No<br>preoperative<br>neurological<br>complications<br>(n = 501) | Preoperative<br>neurological<br>complications<br>(n = 187) | p-Value      |
|-----------------------------------------------|------------------------------------------------------------------|------------------------------------------------------------|--------------|
| <i>Patient characteristics</i>                |                                                                  |                                                            |              |
| Age (years)                                   | 64 (52-72)                                                       | 63 (55-71)                                                 | 0.75         |
| Female                                        | 114 (22.8)                                                       | 61 (32.6)                                                  | <b>0.008</b> |
| BMI (kg/m <sup>2</sup> )                      | 25.6 (23.5-29.2)                                                 | 25.8 (23.7-29.3)                                           | 0.69         |
| NYHA class                                    |                                                                  |                                                            |              |
| I                                             | 20 (4.0)                                                         | 5 (2.7)                                                    | 0.41         |
| II                                            | 87 (17.4)                                                        | 19 (10.2)                                                  | <b>0.02</b>  |
| III                                           | 233 (46.5)                                                       | 88 (47.1)                                                  | 0.90         |
| IV                                            | 161 (32.1)                                                       | 75 (40.1)                                                  | 0.05         |
| Coronary artery disease                       | 276 (55.1)                                                       | 96 (51.3)                                                  | 0.38         |
| Atrial fibrillation                           | 102 (20.4)                                                       | 49 (26.2)                                                  | 0.10         |
| Renal disease                                 | 194 (38.7)                                                       | 75 (40.1)                                                  | 0.74         |
| Acute kidney failure                          | 47 (9.4)                                                         | 23 (12.3)                                                  | 0.26         |
| Dialysis                                      | 39 (7.8)                                                         | 21 (11.2)                                                  | 0.15         |
| Hepatic disease                               | 125 (25.0)                                                       | 57 (30.5)                                                  | 0.14         |
| Previous stroke                               | 58 (11.6)                                                        | 33 (17.6)                                                  | <b>0.04</b>  |
| <i>Infective endocarditis characteristics</i> |                                                                  |                                                            |              |

|                               |                |                |                  |
|-------------------------------|----------------|----------------|------------------|
| Previous IE                   | 25 (5.0)       | 13 (7.0)       | 0.32             |
| Affected valve                |                |                |                  |
| Aortic                        | 343 (68.5)     | 109 (58.3)     | <b>0.01</b>      |
| Native                        | 259 (51.7)     | 80 (42.8)      |                  |
| Prosthetic                    | 84 (16.8)      | 29 (15.5)      |                  |
| Mitral                        | 260 (51.9)     | 117 (62.6)     | <b>0.01</b>      |
| Native                        | 222 (44.3)     | 106 (56.7)     |                  |
| Prosthetic                    | 38 (7.6)       | 11 (5.9)       |                  |
| Double valve                  | 102 (20.4)     | 39 (20.9)      | 0.89             |
| Prosthetic valve endocarditis | 96 (19.2)      | 36 (19.3)      | 0.98             |
| Sepsis                        | 148 (29.5)     | 86 (46.0)      | <b>&lt;0.001</b> |
| Congestive heart failure      | 179 (35.7)     | 55 (29.4)      | 0.12             |
| Embolic events                | 66 (13.2)      | 165 (88.2)     | <b>&lt;0.001</b> |
| Brain                         | 0 (0.0)        | 163 (87.2)     | <b>&lt;0.001</b> |
| Peripheral emboli             | 65 (13.0)      | 47 (25.1)      | <b>&lt;0.001</b> |
| Spleen                        | 47 (9.4)       | 35 (18.7)      | <b>0.001</b>     |
| Lungs                         | 3 (0.6)        | 4 (2.1)        | 0.09             |
| Liver                         | 2 (0.4)        | 4 (2.1)        | 0.05             |
| Limbs                         | 18 (3.6)       | 12 (6.4)       | 0.11             |
| Kidney                        | 12 (2.4)       | 7 (3.7)        | 0.34             |
| Heart                         | 3 (0.6)        | 5 (2.7)        | <b>0.04</b>      |
| Laboratory values             |                |                |                  |
| C-reactive protein (mg/dL)    | 4.1 (1.6-9.4)  | 6.3 (2.5-13.1) | <b>0.001</b>     |
| WBC (x10 <sup>9</sup> /L)     | 9.0 (7.1-12.3) | 9.6 (7.5-14.0) | 0.11             |
| Creatinine (mg/dL)            | 1.1 (0.8-1.5)  | 1.0 (0.8-1.7)  | 0.42             |

|                                     |               |               |                  |
|-------------------------------------|---------------|---------------|------------------|
| Bilirubin (mg/dL)                   | 0.6 (0.4-0.9) | 0.6 (0.3-1.3) | 0.64             |
| Causative microorganism             |               |               |                  |
| Pathogen isolated                   | 351 (70.1)    | 143 (76.5)    | 0.10             |
| Staphylococcus spp.                 | 145 (28.9)    | 71 (38.0)     | <b>0.02</b>      |
| Staphylococcus aureus               | 89 (17.8)     | 62 (33.2)     | <b>&lt;0.001</b> |
| MRSA                                | 12 (2.4)      | 5 (2.7)       | 0.79             |
| Coagulase-negative<br>staphylococci | 56 (11.2)     | 9 (4.8)       | <b>0.01</b>      |
| Streptococcus spp.                  | 101 (20.2)    | 45 (24.1)     | 0.27             |
| Viridans group<br>streptococci      | 70 (14.0)     | 24 (12.8)     | 0.70             |
| Streptococcus bovis                 | 22 (4.4)      | 14 (7.5)      | 0.11             |
| Enterococcus spp.                   | 73 (14.6)     | 13 (7.0)      | <b>0.007</b>     |
| HACEK group                         | 3 (0.6)       | 1 (0.5)       | >0.99            |
| Fungi                               | 1 (0.2)       | 1 (0.5)       | 0.47             |
| Other                               | 28 (5.6)      | 12 (6.4)      | 0.68             |
| Annular abscess                     | 158 (31.5)    | 74 (39.6)     | 0.05             |
| Vegetation                          | 374 (74.7)    | 155 (82.9)    | 0.26             |
| Vegetation size (mm)                | 13 (9-17)     | 18 (13-24)    | <b>&lt;0.001</b> |
| <i>Surgical characteristics</i>     |               |               |                  |
| Urgency of operation                |               |               |                  |
| Elective                            | 73 (14.6)     | 17 (9.1)      | 0.06             |
| Urgent                              | 250 (49.9)    | 82 (43.9)     | 0.16             |
| Emergency                           | 155 (30.9)    | 73 (39.0)     | <b>0.045</b>     |
| Salvage procedure                   | 23 (4.6)      | 15 (8.0)      | 0.08             |
| Bypass time (min)                   | 135 (97-189)  | 147 (107-195) | 0.14             |

|                                                                                                                                                                                                          |                 |                  |              |
|----------------------------------------------------------------------------------------------------------------------------------------------------------------------------------------------------------|-----------------|------------------|--------------|
| Cross clamp time (min)                                                                                                                                                                                   | 88 (63-121)     | 93 (69-122)      | 0.07         |
| RBC (mL)                                                                                                                                                                                                 | 1225 (900-2100) | 1800 (1200-2400) | <b>0.009</b> |
| FFP (mL)                                                                                                                                                                                                 | 0 (0-800)       | 400 (0-1000)     | 0.06         |
| Reperfusion time (min)                                                                                                                                                                                   | 32 (23-51)      | 35 (24-53)       | 0.17         |
| Operation duration (min)                                                                                                                                                                                 | 240 (186-328)   | 255 (191-329)    | 0.43         |
| Site of valve surgery                                                                                                                                                                                    |                 |                  |              |
| AV replacement                                                                                                                                                                                           | 239 (47.7)      | 69 (36.9)        | <b>0.01</b>  |
| MV replacement                                                                                                                                                                                           | 153 (30.5)      | 78 (41.7)        | <b>0.006</b> |
| AV + MV replacement                                                                                                                                                                                      | 98 (19.6)       | 34 (18.2)        | 0.68         |
| AV replacement + MV repair                                                                                                                                                                               | 9 (1.8)         | 6 (3.2)          | 0.25         |
| MV repair                                                                                                                                                                                                | 2 (0.4)         | 0 (0.0)          | >0.99        |
| Type of valve surgery                                                                                                                                                                                    |                 |                  |              |
| Biological prosthesis                                                                                                                                                                                    | 218 (43.5)      | 92 (49.2)        | 0.18         |
| Mechanical prosthesis                                                                                                                                                                                    | 281 (56.1)      | 95 (50.8)        | 0.22         |
| Concomitant surgery                                                                                                                                                                                      |                 |                  |              |
| CABG                                                                                                                                                                                                     | 72 (14.4)       | 18 (9.6)         | 0.10         |
| TV surgery                                                                                                                                                                                               | 60 (12.0)       | 19 (10.2)        | 0.51         |
| VSD repair                                                                                                                                                                                               | 12 (2.4)        | 2 (1.1)          | 0.37         |
| PFO repair                                                                                                                                                                                               | 25 (5.0)        | 4 (2.1)          | 0.10         |
| ASD repair                                                                                                                                                                                               | 6 (1.2)         | 3 (1.6)          | 0.71         |
| Aortic surgery                                                                                                                                                                                           | 39 (7.8)        | 11 (5.9)         | 0.39         |
| Splenectomy                                                                                                                                                                                              | 18 (3.6)        | 1 (0.5)          | <b>0.03</b>  |
| Data are presented as n (%) or median (25th – 75th percentile).                                                                                                                                          |                 |                  |              |
| Bold values indicate statistically significant differences ( $p < 0.05$ ).                                                                                                                               |                 |                  |              |
| ASD: atrial septal defect; AV: aortic valve; BMI: body mass index; CABG: coronary artery bypass grafting; FFP: fresh frozen plasma; HACEK: <i>Haemophilus species</i> , <i>Aggregatibacter species</i> , |                 |                  |              |

*Cardiobacterium hominis*, *Eikenella corrodens*, *Kingella species*; IE: infective endocarditis; MRSA: methicillin-resistant *Staphylococcus aureus*; MV: mitral valve; NYHA: New York Heart Association; PFO: patent foramen ovale; RBC: red blood cell; TV: tricuspid valve; VSD: ventricular septal defect; WBC: white blood cell

**Table S2.** Intraoperative data for early vs. delayed surgery after preoperative stroke

| Variable                           | Early surgery<br>(n = 61) | Delayed surgery<br>(n = 86) | p-Value          |
|------------------------------------|---------------------------|-----------------------------|------------------|
| Time from stroke to surgery (days) | 3 (1-6)                   | 22 (13-36)                  | <b>&lt;0.001</b> |
| Urgency of operation               |                           |                             |                  |
| Elective                           | 4 (6.6)                   | 10 (11.6)                   | 0.30             |
| Urgent                             | 23 (37.7)                 | 42 (48.8)                   | 0.18             |
| Emergency                          | 29 (47.5)                 | 27 (31.4)                   | <b>0.047</b>     |
| Salvage procedure                  | 5 (8.2)                   | 7 (8.1)                     | >0.99            |
| Bypass time (min)                  | 148 (100-187)             | 139 (111-196)               | 0.92             |
| Cross clamp time (min)             | 95 (66-120)               | 91 (71-123)                 | 0.95             |
| RBC (mL)                           | 1800 (1200-2400)          | 1500 (900-2175)             | 0.16             |
| FFP (mL)                           | 750 (0-1200)              | 0 (0-800)                   | <b>0.003</b>     |
| Reperfusion time (min)             | 35 (23-54)                | 35 (25-49)                  | 0.98             |
| Operation duration (min)           | 245 (188-301)             | 255 (194-332)               | 0.58             |
| Site of valve surgery              |                           |                             |                  |
| AV replacement                     | 20 (32.8)                 | 35 (40.7)                   | 0.33             |
| MV replacement                     | 28 (45.9)                 | 35 (40.7)                   | 0.53             |
| AV + MV replacement                | 13 (21.3)                 | 13 (15.1)                   | 0.33             |
| AV replacement + MV repair         | 0                         | 3 (3.5)                     | 0.27             |
| MV repair                          | 0                         | 0                           |                  |

|                                                                                                                                                                                                                                     |            |            |             |
|-------------------------------------------------------------------------------------------------------------------------------------------------------------------------------------------------------------------------------------|------------|------------|-------------|
| Type of valve surgery                                                                                                                                                                                                               |            |            | <b>0.04</b> |
| Biological prosthesis                                                                                                                                                                                                               | 25 (41.0)  | 50 (58.1)  |             |
| Mechanical prosthesis                                                                                                                                                                                                               | 36 (59.0)  | 36 (41.9)  |             |
| Size of implanted valve                                                                                                                                                                                                             |            |            |             |
| Aortic valve (mm)                                                                                                                                                                                                                   | 23 (23-25) | 23 (21-25) | 0.07        |
| Mitral valve (mm)                                                                                                                                                                                                                   | 31 (29-31) | 31 (29-31) | 0.98        |
| Concomitant surgery                                                                                                                                                                                                                 |            |            |             |
| CABG                                                                                                                                                                                                                                | 3 (4.9)    | 9 (10.5)   | 0.36        |
| TV surgery                                                                                                                                                                                                                          | 9 (14.8)   | 8 (9.3)    | 0.31        |
| VSD repair                                                                                                                                                                                                                          | 1 (1.6)    | 1 (1.2)    | >0.99       |
| PFO repair                                                                                                                                                                                                                          | 1 (1.6)    | 2 (2.3)    | >0.99       |
| ASD repair                                                                                                                                                                                                                          | 0          | 1 (1.2)    | >0.99       |
| Aortic surgery                                                                                                                                                                                                                      | 1 (1.6)    | 7 (8.1)    | 0.14        |
| Data are presented as n (%) or median (25th – 75th percentile).                                                                                                                                                                     |            |            |             |
| Bold values indicate statistically significant differences ( $p < 0.05$ ).                                                                                                                                                          |            |            |             |
| ASD: atrial septal defect; AV: aortic valve; CABG: coronary artery bypass grafting; FFP: fresh frozen plasma; MV: mitral valve; PFO: patent foramen ovale; RBC: red blood cell; TV: tricuspid valve; VSD: ventricular septal defect |            |            |             |

**Table S3.** Multivariable logistic regression: Risk factors for postoperative neurological complications of early vs. delayed surgery after preoperative stroke (n = 147)

| Variable                                 | OR    | 95% CI       | <i>p</i> -Value |
|------------------------------------------|-------|--------------|-----------------|
| Enterococcus spp.                        | 7.533 | 1.184-47.924 | 0.03            |
| Operation duration (per 10 min increase) | 1.059 | 1.002-1.119  | 0.04            |
| CI: confidence interval; OR: odds ratio  |       |              |                 |
